# Supplementary material
Source: Springer Nature journal article supplement (https://www.springermedizin.de/resource/supplementary/12982_2014_123_MOESM3_ESM.pdf/9604252)
Supplement: MOESM3 [file 9604252]

personal history of rhinitis or eczema

23 18

family history of asthma, rhinitis or eczema

14,17,18,19,20, 21,22,23

24

infections in pregnancy

33

synthetic bedding

41

pets in home

22,40

19,21,23,24

childhood non-respir. infections

13,14,21,31

17,22, 31

childhood lower respiratory infections

14,17,18,28,29,

30

daycare

21,24,38

14

sleep deprivation

42

dampness/ mold

17,19,22,23, 24,25

26,27

non specified infections in childhood

32

dirty home or school

14,22

crowding

23

endotoxin exposure

36

siblings / birth order

17,20,22, 23,24

21

pollutants/ insecticides

20,43

inadequate house excreta disposal

21

rodents in home

14

34,35, 36

39

high CRP level

farm exposure

21,24

family income

21,23, 38

parental education

17,38, 47

14,21,24

depression in child 55,56

maternal mental disorder 57,58

lack of material or informational support 58

environmental smoking

23

38

foetal and post-natal growth/birth weight/ low infant FEV

17,23,24, 51

52,53

season of birth

54

problems in pregnancy

33

short or no breast-feeding

19,20,48,49,50

18,24

obesity / overweight

22,38,39

21

sedentary lifestyle

21

smoking parents

19,23,24,44

17,18,20, 21,38

45,46

active smoking
